1        **Widely used commercial ELISA does not detect preHP-2, but recognizes**  
2                    **properdin as a potential second member of the zonulin family**

3                    Running Title: Commercial ELISA for human zonulin detects also properdin

4  
5        Lucas Scheffler<sup>1</sup>, Alyce Crane<sup>1</sup>, Henrike Heyne<sup>1</sup>, Anke Tönjes<sup>2</sup>, Dorit Schleinitz<sup>1</sup>, Christian  
6                    H. Ihling<sup>3</sup>, Michael Stumvoll<sup>2</sup>, Rachel Freire<sup>4</sup>, Maria Fiorentino<sup>4</sup>,  
7                    Alessio Fasano<sup>4</sup>, Peter Kovacs<sup>1\*</sup>, John T. Heiker<sup>5\*</sup>

8  
9        <sup>1</sup>Leipzig University Medical Center, IFB Adiposity Diseases, Leipzig, Germany; <sup>2</sup>Divisions  
10        of Endocrinology and Nephrology, University of Leipzig, Leipzig, Germany; <sup>3</sup>Department of  
11        Pharmaceutical Chemistry and Bioanalytics, Institute of Pharmacy, Martin-Luther-University  
12        Halle-Wittenberg, Halle, Germany; <sup>4</sup>Mucosal Immunology And Biology Research Center,  
13        Massachusetts General Hospital – Harvard Medical School, Boston, MA U.S.A.; <sup>5</sup>Institute of  
14        Biochemistry, Faculty of Biosciences, Pharmacy and Psychology, University of Leipzig,  
15        Leipzig, Germany

16  
17        **\*Corresponding authors:**

18        E-mail: [jheiker@uni-leipzig.de](mailto:jheiker@uni-leipzig.de)

19        E-mail: [peter.kovacs@medizin.uni-leipzig.de](mailto:peter.kovacs@medizin.uni-leipzig.de)

20  
21  
22  
23  
24  
25        **Keywords:** diabetes - lipid metabolism - pre-Haptoglobin 2 - ELISA - intestinal permeability  
26        - properdin – obesity – metabolic diseases

27  
28        **Nonstandard abbreviations:** HP, haptoglobin; T2D, type 2 diabetes; WHR, waist-to-hip  
29        ratio.

30 **Abstract**

31 **BACKGROUND.** There is increasing evidence for the role of impaired intestinal  
32 permeability in obesity and associated metabolic diseases. Zonulin is an established serum  
33 marker for intestinal permeability and identical to pre-haptoglobin2. Here, we aimed to  
34 investigate the relationship between circulating zonulin and metabolic traits related to obesity.

35 **METHODS.** Serum zonulin was measured by using a widely used commercial ELISA kit in  
36 376 subjects from the metabolically well-characterized cohort of Sorbs from Germany. In  
37 addition, haptoglobin genotype was determined in DNA samples from all study subjects.

38 **RESULTS.** As zonulin concentrations did not correlate to the haptoglobin genotypes, we  
39 investigated the specificity of the zonulin ELISA assay using antibody capture experiments,  
40 mass spectrometry and Western blot analysis. Using serum samples that gave the highest or  
41 lowest ELISA signals, we detected several proteins that are likely to be captured by the  
42 antibody in the present kit. However, none of these proteins corresponds to pre-haptoglobin2.  
43 We used increasing concentrations of recombinant pre-haptoglobin 2 and complement C3 as  
44 one of the representative captured proteins and the ELISA kit did not detect either. Western  
45 blot analysis using both the polyclonal antibodies used in this kit and monoclonal antibodies  
46 rose against zonulin showed a similar protein recognition pattern but with different intensity  
47 of detection. The protein(s) measured using the ELISA kit was (were) significantly increased  
48 in patients with diabetes and obesity and correlated strongly with markers of the lipid and  
49 glucose metabolism. Combining mass spectrometry and Western blot analysis using the  
50 polyclonal antibodies used in the ELISA kit, we identified properdin as another member of  
51 the zonulin family.

52 **CONCLUSIONS.** Our study suggests that the zonulin ELISA does not recognize pre-  
53 haptoglobin 2, rather structural (and possibly functional) analogue proteins belonging to the  
54 mannose-associated serine protease family, with properdin being the most likely possible  
55 candidate.

## 56 **Introduction**

57 The “intestinal barrier” is an established term, defined as a functional entity separating the gut  
58 lumen from the inner host, and consisting of mechanical, humoral, immunological, muscular  
59 and neurological elements. Intestinal barrier dysfunction is a characteristic feature of  
60 pathological states such as inflammatory bowel disease, celiac disease, nonalcoholic  
61 steatohepatitis and ulcerative colitis (1, 2). There is also emerging evidence for the role of  
62 impaired intestinal permeability in metabolic diseases including obesity and type 2 diabetes  
63 (T2D) (3–5). It has been hypothesized that gut bacteria and bacterial endotoxins may disrupt  
64 the intestinal barrier resulting in the so called “leaky gut” (4, 6). The leakage of toxins,  
65 bacterial components or even live bacteria and their transfer to target organs such as adipose  
66 tissue might contribute to the development of obesity and T2D (6, 7). Indeed, numerous  
67 studies in mouse models have demonstrated that changes in the gut microbiota can alter the  
68 gut permeability and lead to an endotoxemia-induced inflammation in adipose tissue, and  
69 ultimately to obesity (3, 8, 9). Results from experimental mouse models are supported by  
70 studies in humans by showing an increase in circulating endotoxin levels and circulating  
71 bacterial DNA in obese/diabetic patients, likely due to an increased intestinal permeability in  
72 affected subjects (10, 11).

73 Intestinal barrier transport is mainly regulated by structures of the paracellular pathway called  
74 tight junctions which form barriers between epithelial cells and regulate the transport of ions  
75 and small molecules across the intestinal lumen. Intestinal permeability is a functional feature  
76 of the intestinal barrier. It can be measured by analyzing flux rates of inert molecules across  
77 the intestinal wall as a whole or across wall components (1). The gold standard for assessment  
78 of intestinal permeability in vivo is an assay combining indigestible large and small  
79 oligosaccharides, such as lactulose and mannitol; the larger oligosaccharide, lactulose, is only  
80 transported via the paracellular pathway, whereas the smaller oligosaccharide, mannitol, is  
81 taken up freely over the intestinal barrier via the transcellular route. However, these

82 oligosaccharide assays are expensive, laborious, poorly reproducible, and time consuming.  
83 Therefore, identifying appropriate biomarkers for intestinal permeability is highly desirable.  
84 Zonulin has been identified as a tight junction regulating protein which is, functionally, the  
85 human counterpart of the *Vibrio cholera* endotoxin zonula occludens toxin (12, 13). Precisely,  
86 subsequent studies recognized zonulin as the precursor of haptoglobin 2 (pre-HP2) (14).  
87 Haptoglobin is a well-known protein involved in scavenging hemoglobin, whereas the  
88 function of its precursor is largely unknown. Haptoglobin is first synthesized into a single  
89 chain precursor protein, which is cleaved into a light N-terminal  $\alpha$ -chain and heavy C-  
90 terminal  $\beta$ -chain. An exon duplication of exons 3 and 4 of the haptoglobin gene differentiates  
91 the HP1 from the HP2 allele. Due to this exon duplication the HP2  $\alpha$ -chain is 1.7kb longer  
92 than in the HP1 allele. Haptoglobin is active as tetramer consisting of 2  $\alpha$ - and 2  $\beta$ -chains  
93 linked by disulfide bonds, resulting in three possible genotypes: homozygous HP1/1 and  
94 HP2/2 as well as heterozygous HP1/2 (15, 16). About 15 % of the Caucasian population is  
95 homozygous for HP (16, 17). Zonulin as pre-HP2 reversibly opens tight junctions and is  
96 upregulated in diseases such as celiac disease and type 1 diabetes (T1D) (14, 18). Serum  
97 zonulin concentrations are also increased in T2D and obesity (19–21) and strong correlations  
98 were observed with various metabolic markers, including fasting plasma glucose, IL-6, HDL,  
99 and triglyceride (TG) levels (19–21).

100 Here, we aimed at characterizing the relationship between circulating serum zonulin and traits  
101 related to obesity in a metabolically well-characterized cohort of Sorbs from Germany. To  
102 measure zonulin, we used the commercially available ELISA kit (Immundiagnostik,  
103 Bensheim, Germany). In addition, we determined the haptoglobin genotypes in the entire  
104 cohort. Due to a lack of correspondence between the observed circulating zonulin  
105 concentrations and the haptoglobin genotypes in our study cohort, we further investigated the  
106 possible identity of the product captured by the commercial ELISA assay. We found that the  
107 ELISA kit used in the present study does not detect purified pre-HP2 but rather targets one or

108 more proteins from a range of candidate molecules possibly structurally and functionally  
109 related to zonulin. Our data also showed that protein concentrations measured by this ELISA  
110 correlated with parameters of obesity and related metabolic traits.

111

## 112 **Materials and Methods**

### 113 *Study subjects*

114 All subjects are part of a sample from an extensively clinically characterized population from  
115 Eastern Germany, the Sorbs (22–24). Extensive phenotyping included standardized  
116 questionnaires to assess past medical history and family history, collection of anthropometric  
117 data (weight, height, waist-to-hip ratio (WHR)), and an oral glucose tolerance test. Glucose  
118 was assessed by the Hexokinase method (Automated Analyzer Modular, Roche Diagnostics,  
119 Mannheim, Germany) and serum insulin was measured using the AutoDELFI<sup>A</sup> Insulin assay  
120 (PerkinElmer Life and Analytical Sciences, Turku, Finland). Total serum cholesterol and TG  
121 concentrations were measured by standard enzymatic methods (CHOD-PAP and GPO-PAP;  
122 Roche Diagnostics). Serum LDL-C and HDL-C concentrations were determined using  
123 commercial homogeneous direct measurement methods (Roche Diagnostics). All assays were  
124 performed in an automated clinical chemistry analyzer (Hitachi/ Roche Diagnostics) at the  
125 Institute of Laboratory Medicine, University Hospital Leipzig.

126 All blood samples were taken in the morning after an overnight fast and stored at -80°C until  
127 analyses. From the 1040 Sorbs enrolled in the cohort, a subgroup of 376 subjects was  
128 genotyped for haptoglobin and provided blood samples for zonulin measurements (Table 1).

129 Main metabolic characteristics of the study subjects are summarized in Table 2.

130 The study was approved by the ethics committee of the University of Leipzig and all subjects  
131 gave written informed consent before taking part in the study.

132

133

134 ***ELISA measurements***

135 Circulating zonulin was measured by a competitive ELISA (Immundiagnostik AG, Bensheim,  
136 Germany) in serum samples of 376 individuals according to the manufacturer's protocol.  
137 Inter-assay coefficient of variation was 6.5%. When purified proteins zonulin and properdin  
138 and the synthetic peptide AT1001 were tested by the ELISA, they were re-suspended in PBS  
139 and diluted in Diluent buffer (IDK kit) to reach a final concentration of 5 µg/ml.

140

141 ***Genotyping***

142 Haptoglobin genotypes were determined by PCR using a method adapted from Koch et al.  
143 (17). Briefly, the following two primer pairs were used: A (5'-  
144 GAGGGGAGCTTGCCTTTCCATTG-3') and B (5'-GAGATTTTTGAGCCCTGGCTGGT-  
145 3'), as well as C (5'-CCTGCCTCGTATTAAGTGCACC AT-3') and D (5'-  
146 CCGAGTGCTCCACATAGCCATGT-3'). The primer pair A/B generates two bands: a  
147 1,757-bp allele 1 specific band and a 3,481-bp allele 2 specific band. The primer pair C/D  
148 produces one allele 2 specific band of 349 bp. The combination of the bands allows a  
149 reproducible typing of the two common haptoglobin genotypes HP1 and HP2. In contrast, no  
150 band is detectable for the rare HP deletion genotype, present in ~0.1% Caucasians (16).

151

152 ***Antibody capturing experiment***

153 We aimed to isolate the target protein of the ELISA antibody from serum samples utilizing  
154 the immobilized anti-zonulin antibodies on the ELISA plates to perform antibody capturing  
155 experiments. Based to the manufacturing information, these polyclonal antibodies were raised  
156 against an octapeptide sequenced from the zonulin molecule (25). Equal amounts of undiluted  
157 serum samples with highest and lowest concentrations of zonulin, as measured using the same  
158 ELISA kit, were transferred to separate wells, incubated and washed according to the  
159 manufacturer's protocol. Afterwards we eluted the captured protein(s) by incubation with 50

160  $\mu$ l of hot (95°C) SDS sample buffer with  $\beta$ -mercaptoethanol for 5 minutes. The captured  
161 protein of high or low zonulin serum samples were pooled (N=8 for high (2 pooled groups)  
162 and low (1 pooled group); measured protein concentrations using the zonulin ELISA of the  
163 serum samples is given in Supplementary Table 1). Twenty  $\mu$ l of these elution samples (high  
164 or low zonulin) were separated by SDS-PAGE using precast Bolt 4-12% Bis-Tris Plus gels  
165 (ThermoFisher, Waltham, MA, USA). Proteins were stained using the Pierce silver stain for  
166 mass spectrometry (ThermoFisher) or detected by Western Blot.

167

### 168 *Mass spectrometry*

169 To identify proteins isolated from serum samples as described above, bands were excised  
170 from silver-stained gels and in-gel digested with trypsin following a standard protocol (26).  
171 After enzymatic digestion, the peptide mixtures were immediately analyzed by LC/MS/MS on  
172 an U3000 RSLC nano-HPLC system (Thermo Fisher Scientific) coupled to an Orbitrap  
173 Fusion Tribrid mass spectrometer (Thermo Fisher Scientific). Samples were loaded onto a  
174 pre-column (RP-C8, 300  $\mu$ m \* 5 mm, 5  $\mu$ m, 100 Å, Thermo Fisher Scientific) and washed  
175 with water containing 0.1% (v/v) TFA for 15 min, before the peptides were separated on the  
176 separation column (RP-C18, 75  $\mu$ m \* 250 mm, 2  $\mu$ m, 100 Å, Thermo Fisher Scientific) using  
177 gradients from 1% to 40% (v/v) B (45 min), 40% to 85% (v/v) B (5 min) followed by 85% B  
178 (5 min), with solvent A: 0.1% (v/v) formic acid (FA) in water and solvent B: 0.08% (v/v) FA  
179 in acetonitrile. Data were acquired using data-dependent MS/MS mode where each high-  
180 resolution full-scan in the orbitrap (m/z 198 to 1,500; R = 120,000) was followed by high-  
181 resolution product ion scans in the orbitrap (higher energy collision-induced dissociation  
182 (HCD), 27% normalized collision energy, R = 15,000, isolation window 2 Th) within 5 s,  
183 starting with the most intense signal in the full-scan mass spectrum.

184 Data analysis was performed using the Proteome Discoverer 2.1 (Thermo Fisher Scientific).  
185 MS/MS data of precursor ions (m/z range 350-5,000) were searched against the Swissprot

186 Database (version 11/2016, taxonomy human, 20,082 entries) and a contaminant database  
187 using Sequest HT. Mass accuracy was set to 5 ppm and 20 mmu for precursor and fragment  
188 ions, respectively. Carbamidomethylation of cysteines was set as fixed modification;  
189 oxidation of methionines and N-terminal acetylation were set as variable modifications, two  
190 missed cleavages of trypsin were allowed. Results were filtered for non-contaminant proteins  
191 identified by at least three unique highly confident peptides (peptide FDR  $\leq$  1%).

192

### 193 *Western blot analysis*

194 Western blot experiments were performed to validate the results of mass spectrometric data  
195 analysis and to compare the serum target proteins identified by the polyclonal antibodies used  
196 by this ELISA kit compared to monoclonal anti-zonulin antibodies. Gels were blotted on a  
197 PVDF membrane and Western blots were probed with anti-C3  $\beta$ -chain (1:2000) (Biozol,  
198 Eching, Germany), anti-haptoglobin (1:1000) (Abcam, Cambridge, UK), polyclonal anti-  
199 zonulin (1:500) (kindly provided by Immundiagnostik), monoclonal anti-zonulin (1:5000)  
200 (BioRad, Hercules, CA USA) antibodies. Purified C3c from plasma (Athens Research,  
201 Athens, Georgia, USA) and recombinant zonulin were used as positive controls. Properdin  
202 (R&D Systems Minneapolis, MN, U.S.A.) was also used to validate the potential protein  
203 candidate identified by the ELISA. Incubation with primary and secondary antibodies (HRP-  
204 conjugated) was done for 90 minutes at room temperature. Blots were visualized by enhanced  
205 chemiluminescence using Pierce ECL Western Blotting Substrate (ThermoFisher).

206

### 207 *Statistical analysis*

208 Statistical analysis was performed using with SPSS 24 (IBM). All non-normally distributed  
209 metric parameters were log transformed to generate a Gaussian normal distribution.  
210 Spearman's rank correlation method was used to assess the relationship between metabolic  
211 traits. To test for significant differences in distribution for ordinal values, the Kruskal-Wallis-



212 test was used. Exact differences between two groups were tested by both the Mann-Whitney-  
213 U test and unpaired student's t-test. In addition, multiple linear regression analyses were done  
214 to assess the linear relationship between continuous variables and genotypes. For all tests, a p-  
215 value <0.05 was considered to be statistically significant.

216

## 217 **Results**

### 218 *Haptoglobin genotype*

219 Haptoglobin genotype HP1/1 was present in 15.8% of the subjects, HP1/2 in 47.6% and  
220 HP2/2 in 36.6%. These frequencies are comparable to the distribution of HP genotypes in  
221 cohorts of European ancestry reported by others (16, 17). We tested the association of the HP  
222 genotypes with various anthropometric and metabolic traits in all study subjects. The analysis  
223 revealed that blood hemoglobin levels significantly increase with the presence of at least one  
224 HP2 allele (p=0.004 over all three groups,  $p=4.2 \times 10^{-4}$  between HP1 homozygote and HP2  
225 carriers). Furthermore, we observed that the total protein concentration in the urine  
226 significantly differed between the three groups, with an increase in the HP2 carriers  
227 (p=0.027). Interestingly, mean triiodothyronine (fT3) levels were lower in the HP1/1 group  
228 than in the HP2/2 group (p=0.012) and in accordance, an increase in administered thyroid  
229 gland hormones (p=0.023) was observed.

230

### 231 *Zonulin ELISA data do not match HP genotype distribution*

232 Strikingly, there were no significant differences in levels of the zonulin ELISA signal  
233 between the three haptoglobin genotype groups (Figure 1; p=0.153 using ANOVA, p=0.07 for  
234 the t-test comparing log transformed zonulin signals between HP1/1 vs. HP1/2 + HP2/2).  
235 Assuming that the protein measured by the kit is zonulin (i.e. pre-HP2), subjects with the  
236 HP1/1 genotype were expected to have no detectable zonulin levels. As the zonulin  
237 concentrations measured in patient sera using the zonulin ELISA kit clearly did not reflect the

238 HP genotype distribution we therefore concluded that the protein measured by the kit is not  
239 identical to zonulin as pre-HP2 or that, beside pre-HP2, the kit detects other unrelated  
240 proteins. Consequently, we aimed at identifying the protein(s) detected by the alleged zonulin  
241 ELISA kit.

242

243 ***The zonulin ELISA does not detect recombinant pre-HP2, but targets multiple proteins***

244 To attempt identifying proteins bound and quantified by the capturing antibody deployed in  
245 the zonulin ELISA kit, we performed an immune-capturing experiment using patient sera and  
246 the immobilized antibody of the ELISA kit as supplied. After incubation of the immobilized  
247 ELISA kit antibodies with selected patient sera representing the highest and lowest measured  
248 ELISA signals in the cohort, the captured proteins were separated by SDS-PAGE. Notably,  
249 we could not measure the protein content of the eluted samples, but given that equal amounts  
250 of serum were used, that the same washing and elution procedure was performed for all  
251 samples and that 20µl of the pooled elution samples were used for SDS-PAGE and Western  
252 blot, the detected amount of “captured” protein should resemble the amount of protein that  
253 was present in the initial serum sample.

254 Silver staining revealed multiple bands, with the most intense band at ~70 kDa and further  
255 prominent bands at ~55 kDa, ~180 kDa and >180kDa (Figure 2A). This band pattern was  
256 incompatible with a band pattern that would be expected for pre-HP2 or haptoglobin-derived  
257 proteins and further supported the results demonstrating the lack of correspondence of the  
258 captured protein with HP genotypes. To further characterize major proteins captured by the  
259 ELISA kit, protein bands were cut (Figure 2A) and subjected to MS analysis after tryptic  
260 digestion (Supplementary Table 2). Mass spectrometry demonstrated that bands 1 (>180kDa),  
261 2 (~150 kDa), 3 (~70 kDa) were all very likely representing the C3 protein or cleavage  
262 products derived from the C3 protein, such as the C3 precursor (187 kDa), C3c (144 kDa) and  
263 the C3 β-chain (71 kDa). Furthermore, the 55 kDa band was identified as properdin or factor

264 P (MW 53 kDa). To validate results from mass spectrometry, we performed Western blot  
265 analyses. The major band at 70 kDa was clearly detected by an anti-C3  $\beta$ -chain antibody  
266 (Figure 2B).

267 Consequently, we tested several C3c proteins from different suppliers (Abcam, Cambridge,  
268 UK; Athens Research, Athens, Georgia, USA; mybiosource, San Diego, California, USA), in  
269 a range from 0.1 mg/ml to 0.1 ng/ml under native and denatured conditions, as well as diluted  
270 in serum, with the respective ELISA kit. All results were negative (data not shown),  
271 indicating that C3 might represent a contaminant only. Additionally, we tested C3,  
272 recombinant zonulin, HP1, and HP2 at increasing concentrations (range 1-50  $\mu$ g/ml), along  
273 with sera from celiac patients (both HP1-1 and HP2-2), healthy controls (both HP1-1 and  
274 HP2-2), and our standard control (AF, HP2-2). The results showed in Figure 3 demonstrated  
275 that while this kit does not recognize C3, zonulin, or mature haptoglobin (both HP1 and HP2),  
276 it does recognize protein(s) both in HP1-1 and HP2-2 genotype subjects, irrespective of their  
277 disease status.

278

279 **Anti-zonulin monoclonal antibodies and Immundiagnostik polyclonal antibodies**  
280 **recognize same target proteins in Western blot.**

281 Our ELISA results clearly showed that this kit does not detect zonulin (alias, pre-HP2 as  
282 originally claimed by the manufacturer) or complement C3, the protein captured by our  
283 experiments described above. In order to further characterize the target protein(s) of this kit,  
284 we performed Western blotting analysis of sera from a HP2-2 subject either under baseline  
285 condition or after deglycosylation as we have previously described (14), using recombinant  
286 zonulin as control. As anticipated, the zonulin monoclonal antibodies recognized recombinant  
287 zonulin as well as a variety of bands in the serum sample, including bands with a MW of ~70,  
288 52, 37, 27, and 16 kDa (Figure 4A). Based on similar patterns we detected when zonulin was  
289 originally cloned (14), we predicted that the ~72 kDa corresponded to the glycosylated HP  $\beta$ -

290 chain, the 52 kDa zonulin, and the 16 kDa the HP2  $\alpha$ -chain. To confirm this interpretation, we  
291 performed deglycosylation experiments showing the shift of the 72 kDa  $\beta$ -chain to a lower  
292 MW, while, as anticipated, the zonulin band and the HP2  $\alpha$ -chain remained unchanged  
293 (Figure 4A). Interestingly enough, the Immundiagnostik polyclonal antibodies raised against  
294 the zonulin synthetic peptide inhibitor GGVLVQPG (AT1001) (25) recognized the same main  
295 bands detected by the monoclonal antibodies but with different intensity, being the  
296 recombinant zonulin and serum  $\alpha$ -chain bands fainter compared to the monoclonal antibody  
297 signal, while the serum  $\beta$ -chain and serum zonulin-like signals stronger (Figure 4A). When  
298 combined to our ELISA results, these data suggest that, while the zonulin monoclonal  
299 antibodies specifically detect in serum samples only zonulin at its predicted molecular weight,  
300 most likely the polyclonal antibodies used in this kit are possibly detecting “zonulin-like”  
301 protein(s) (as suggested by the much more intense signal of the ~52 kDa band compared to  
302 the monoclonal antibodies) with similar molecular weight, structure, and possibly function.

303

304 **Immundiagnostik polyclonal antibodies recognize both zonulin as well as properdin as**  
305 **an additional target in Western blot**

306 Among all the proteins we identified with our mass spec analysis, properdin fulfills the  
307 structural-functional characteristics mentioned above and, therefore, may represent the most  
308 likely candidate target detected by this ELISA kit. To explore this hypothesis, we performed  
309 both Western blotting analysis using the Immunodiagnostik polyclonal antibodies and ELISA  
310 test using commercially available properdin. The Western blot showed that beside  
311 recombinant zonulin, the Immunodiagnostik polyclonal antibodies also detect properdin (Fig  
312 4B) that migrated at the same molecular weight of zonulin and serum bands recognized by the  
313 antibodies in both HP2-2 and HP 1-1 subjects (Fig 4B). Similar results were obtained with  
314 polyclonal antibodies raised against recombinant zonulin (data not shown). The same samples  
315 used for Western blotting analysis, including zonulin, properdin and AT1001 at a

316 concentration of 5 µg/ml were tested using the ELISA kit. The results showed that properdin  
317 and AT1001 were both detected by the ELISA test, however, their amounts were substantially  
318 underestimated by 914 (5.47 ng/ml) and 40 folds (126.04 ng/ml), respectively. However,  
319 despite zonulin being detected in Western blot, it was not detected with the ELISA kit (Figure  
320 3). In comparison, serum from subjects with HP 1-1 and HP 2-2 genotype were measured at a  
321 concentration of 67.54 and 56.41 ng/ml, respectively (Table 3).

322

### 323 *Correlations of measured protein concentrations using the ELISA with metabolic traits*

324 In a sample of 376 subjects tested using the purchased zonulin ELISA, the product was  
325 measured in a mean concentration of  $72.2 \pm 27.2$  ng/ml (mean  $\pm$  standard deviation), ranging  
326 from 17.8 to 207.1 ng/ml. The ELISA signal was significantly increased in subjects with T2D  
327 ( $81.78 \pm 25.31$  ng/ml) compared to subjects with normal glucose tolerance ( $67.25 \pm 25.45$   
328 ng/ml, Mann-Whitney-U test;  $p=2.1 \times 10^{-8}$ ) or impaired glucose tolerance ( $71.88 \pm 29.36$   
329 ng/ml,  $p=0.0017$ ) (Figure 5A). Additionally, lean subjects had significantly lower values  
330 ( $65.64 \pm 25.23$  ng/ml) than subjects with overweight ( $74.20 \pm 30.68$  ng/ml,  $p=0.0082$ ) or  
331 obesity ( $76.24 \pm 24.17$  ng/ml,  $p=7.0 \times 10^{-5}$ ) (Figure 5B). We observed no gender differences or  
332 any correlations with age (data not shown). The ELISA signal correlated with traits related to  
333 glucose and lipid metabolism (Spearman's rank correlation test, adjusted for age, sex and  
334 BMI; Table 4). It was positively correlated with BMI, HOMA-IR and -IS and fasting plasma  
335 glucose (Table 4). Strong correlations were also observed for lipid metabolism parameters,  
336 such as TG levels, total cholesterol, LDL and apolipoprotein B (Table 4). Correlations were  
337 tested for a total of 95 accessible traits. After Bonferroni correction for multiple testing  
338 (adjusted p-value for significance  $p < 5.2 \times 10^{-4}$ ), correlations for BMI ( $p=1.2 \times 10^{-5}$ ), fasting  
339 glucose ( $p=9.0 \times 10^{-6}$ ), TG ( $p=4.2 \times 10^{-10}$ ), total cholesterol ( $p=3.3 \times 10^{-5}$ ) and apolipoprotein B  
340 ( $p=2.3 \times 10^{-5}$ ) remained statistically significant.

341

342

343

## 344 **Discussion**

345 The role of impaired intestinal permeability in metabolic diseases including obesity and T2D  
346 has recently been acknowledged in multiple studies (3, 4, 27). The tight junction regulator  
347 zonulin, which was identified as pre-HP2 by Tripathi et al. (14), is an established circulating  
348 marker of intestinal permeability in humans (28, 29). Here, we aimed to investigate the  
349 relationship between intestinal permeability, represented by circulating zonulin, and metabolic  
350 traits related to obesity and T2D. We set out to measure zonulin with a widely used  
351 commercially available ELISA kit in a metabolically well-characterized cohort of Sorbs from  
352 Germany. Considering the identity of zonulin as pre-HP2, we also genotyped the haptoglobin  
353 gene in DNA samples from all subjects. The genotype frequency of the HP1/1 genotype  
354 corresponded to previously reported frequencies of 15% in populations of European ancestry  
355 (16, 17). Assuming that the measured zonulin is identical with pre-HP2 as reported previously  
356 (13), we expected subjects with the HP1/1 genotype to have no detectable, or if taking into  
357 account cross-reactions, at least significantly lower zonulin levels. However, concentrations  
358 measured in the HP1/1 homozygous subjects were comparable with those found in HP2/2 and  
359 HP1/2 carriers.

360 The epitope used to generate the capture antibody in the zonulin ELISA is based on the  
361 sequence GGVLVQPG published by Wang et al. (25) (communication with customer  
362 support; Immundiagnostik AG, Bensheim, Germany), which was initially thought to represent  
363 the N-terminal sequence of fetal zonulin (25). However, this sequence is not present in pre-  
364 HP2, which has since been proposed to be zonulin by the same authors (14). According to the  
365 authors, the discrepancies between the previously reported zonulin sequence and the pre-HP2  
366 sequence may be due to intraspecies variability associated with a high zonulin mutation rate  
367 or due to sequencing errors at that time (14). In summary, the commercially available

368 competitive ELISA does very likely not detect preHP2 or zonulin, but rather unknown targets  
369 bound by the antibody raised against the sequence reported by Wang et al (25).  
370 Based on database searches, the epitope could correspond to Glu-Rich2, a protein which  
371 shares 7 out of 8 amino acids. The zonulin/preHP2 binding partner CD163 shows some  
372 conformity with the epitope (30). Our antibody capture experiment and subsequent mass  
373 spectrometry analysis did not provide any evidence for either protein. The most abundant  
374 protein identified by MS, C3, is evidently an unspecific product overshadowing the real  
375 targets. Indeed, the respective ELISA kit did not detect any complement C proteins obtained  
376 from different suppliers when tested under native and denatured conditions, as well as diluted  
377 in serum. Also, the same kit did not detect recombinant zonulin, mature HP1 or mature HP2.  
378 Considering the additional MS hits, a few proteins stand out, although, without further  
379 validation, we interpret these data with caution, since only more abundant proteins may be  
380 identified by MS analysis, while our protein(s) of interest may be in low abundance in serum  
381 samples and, therefore, not identifiable with this approach. The van Willebrand factor (vWF,  
382 band A, Figure 2) is involved in the intrinsic coagulation pathway and the acute phase  
383 response and known to be increased in inflammatory bowel disease and bacterial diarrhea  
384 (31). Inter-alpha-inhibitor heavy chain 4 (band B, Figure 2) a large glycoprotein cleaved into  
385 smaller fragments by Kallikrein which is also involved in the intrinsic coagulation pathway.  
386 One of these fragments, called urinary trypsin-inhibitor, attenuates LPS-induced endothelial  
387 barrier dysfunction by upregulation of vascular endothelial-cadherin expression (32).  
388 Complement component 9 (C9, band C, Figure 2) is an important component of the  
389 membrane attacking complex within the complement cascade and is required for complement-  
390 mediated lipopolysaccharide release and outer membrane damage in bacteria (33). Protein  
391 S100-A8, or Calprotectin, (band D, Figure 2) is a calcium- and zinc-binding protein which  
392 plays a prominent role in the regulation of inflammatory processes and immune response (34).  
393 However, based on the data presented in Figure 4, our most likely candidate(s) should be in

394 the ~50 kDa range, where the polyclonal antibody signal was stronger. Therefore, the most  
395 interesting candidate protein we have identified is properdin or factor P (band D, Figure 2), a  
396 member of the complement alternative pathway that has a molecular weight (53 kDa), within  
397 the range of those proteins recognized by the Immundiagnostik anti-AT1001 polyclonal  
398 antibodies (Figures 4A and B) and serum levels (~25 ng/ml) (35) similar to the range of  
399 detection of the kit. Our combined Western blot analysis (Figure 4B) and ELISA test  
400 confirmed that the polyclonal antibodies raised against AT1001 detect properdin amongst  
401 other proteins. However, when purified proteins/peptides, including the AT1001 peptide used  
402 to raise the polyclonal antibodies, which is also used as internal control in the ELISA kit,  
403 were tested by ELISA, they were highly under-estimated by the test. One possible explanation  
404 for these results is that zonulin and also properdin are not the main targets detected by the  
405 ELISA, however the fact that even AT1001 was under-estimated seems to suggest that this  
406 hypothesis cannot entirely explain our results. Alternatively, it is possible that tertiary and  
407 quaternary (multimers) structure arrangements present in sera samples but not in recombinant  
408 proteins are necessary in order to properly detect both zonulin and properdin by this ELISA.  
409 If this is the case and/or that the main target of this ELISA is/are additional proteins in the  
410 ~50kDa range present in human serum remains to be established.

411 Once released from neutrophils, T cells and macrophages in response to acute microbial  
412 exposure, properdin causes production of chemotactic anaphylatoxin C3a and C5a with  
413 subsequent formation of immune complexes that cause increased endothelial permeability  
414 (35). Intriguingly, zonulin as pre-HP2 also causes generation of C3a and C5a, with  
415 subsequent increased vascular permeability in several districts, including the lung, with  
416 subsequent onset of acute lung injury (36). Another striking similarity between zonulin and  
417 properdin is the fact that both are associated to viral respiratory tract infections (37, 38).

418 Notably, the peptide sequence used for the generation of the antibody is also not present in  
419 any of the discussed proteins. The five proteins mentioned above, including properdin, have



420 ~50% similarity to this epitope. Zonulin as preHP-2 is a member of a larger family of tight  
421 junction regulating proteins. Indeed, phylogenetic analyses suggest that haptoglobins evolved  
422 from mannose-associated serine protease (MASP), a complement-associated protein (like  
423 properdin), with their alpha-chain containing a complement control protein (CCP) (this  
424 domain activates complement similarly to properdin), while the  $\beta$ -chain is related to  
425 chymotrypsin-like serine proteases (SP domain) (39, 40). However, the SP domain of HP  
426 lacks the essential catalytic amino acid residues required for protease function; structure-  
427 function analyses have implicated this domain in receptor recognition and binding (41).  
428 Although not a serine protease, zonulin shares approximately 19% amino acid sequence  
429 homology with chymotrypsin, and their genes both map on chromosome 16. Alignment of the  
430  $\beta$ -chain sequence of zonulin to that of several serine proteases is remarkably consistent except  
431 for an insertion of 16 residues in the region corresponding to the methionyl loop of the serine  
432 proteases. Comparison of the zonulin  $\alpha$ - $\beta$  junction region with the heavy-light-chain junction  
433 of tissue-type plasminogen activator strengthens the evolutionary homology of zonulin and  
434 serine proteases. The active-site residues typical of the serine proteases, His57 and Ser195,  
435 are replaced in zonulin by lysine and alanine, respectively. Because of these mutations, during  
436 evolution zonulin most likely lost its protease activity despite that zonulin and serine  
437 proteases evolved from a common ancestor (18). Therefore, zonulin, and the serine proteases  
438 represent a striking example of homologous proteins with different biological functions but  
439 with the common characteristic of complement activation. Beside zonulin and properdin,  
440 other members of the MASP family include a series of plasminogen-related growth factors  
441 (epidermal growth factor (EGF), hepatocyte growth factor (HGF), etc.) involved in cell  
442 growth, proliferation, differentiation and migration, and disruption of intercellular junctions.  
443 In light of these considerations, other MASP members identified in our capturing experiments  
444 in general, and properdin in particular, are intriguing possible targets (36).

445 Analyzing the protein concentrations measured using this ELISA in subjects who have been  
446 extensively characterized for metabolic phenotypes, our data suggest that it is upregulated  
447 both in diabetic and obese patients. This is in line with previously reported findings using this  
448 ELISA kit (19–21). Our data shows, that the ELISA target is potentially involved in the lipid  
449 metabolism by showing in various linear stepwise regression models that triglyceride levels  
450 and fasting glucose are the strongest independent available variables explaining the observed  
451 variance in measured protein concentrations (Supplementary Table 3).

452 It is important to note, that our study, as it has not been initially designed to address the  
453 question of ELISA specificity, has clear limitations. To obtain amounts of isolated protein in  
454 the antibody capture experiments, we needed to change the experimental protocol provided by  
455 the manufacturer. We used undiluted serum samples instead of a 50-fold dilution, which very  
456 likely increased the risk of non-specific binding. Yet, we used sera from patient that exhibited  
457 the highest and the lowest concentrations measured by the ELISA kit using the  
458 manufacturer's protocol. Thus, any non-specific binding should be detected as equally strong  
459 bands in the silver stained gels after the antibody capture experiment. Yet, we observed band  
460 intensities of affinity purified protein that clearly correlated with the concentrations measured  
461 using the ELISA, in the silver stained gels (total protein) and in the Western blot using the  
462 anti-C3- $\beta$ -chain antibody, indicating a specific isolation of proteins recognized by the kit  
463 antibody. Nevertheless, ELISA results that failed to recognize C3 disputed the notion that  
464 complement C3 is the target of this kit. Also, we have performed this experiment using two  
465 different Lot no. of the ELISA, using sera from eight different patients of each high and low  
466 concentration and obtained the same results.

467 In conclusion, based on our data we suggest that the Immundiagnostik ELISA kit supposedly  
468 testing serum zonulin (pre-HP2) levels could identify a variety of proteins structurally and  
469 possibly functionally related to zonulin, suggesting the existence of a family of zonulin  
470 proteins as previously hypothesized (42), rather than a single member of permeability-

471 regulating proteins. Additional studies are necessary to establish the primary target proteins  
472 (zonulin, properdin and/or other structurally similar proteins) detected by this commercially  
473 available ELISA.

#### 474 **Acknowledgements**

475 We thank all those who participated in the studies, in particular our study subjects. We thank  
476 Dr. Ingo Bechmann for helpful advice and discussions.

477

#### 478 **Funding**

479 This work was supported by grants from the German Research Council (SFB-1052 “Obesity  
480 mechanisms” B03, C01, C07), from the German Diabetes Association and from the DHFD  
481 (Diabetes Hilfs- und Forschungsfonds Deutschland). IFB Adiposity Diseases is supported by  
482 the Federal Ministry of Education and Research (BMBF), Germany, FKZ: 01EO1501 (AD2-  
483 060E, AD2-6E99), and by the National Institutes of Health (NIH) U.S.A. grants R01-  
484 DK104344 and P30-DK040461.

485

#### 486 **Author contributions**

487 LS, PK and JTH conceived the study, designed and conducted experiments, analyzed data and  
488 wrote the paper. AT recruited patients. CHI performed mass spectrometry experiments. AC,  
489 HH, DS and MS interpreted and analyzed data. RF performed the zonulin ELISA test, MF  
490 performed the Western blotting analysis, and AF critically revised the manuscript, contributed  
491 to the study design of some of the performed experiments, and provided critical interpretation  
492 of the data. All authors discussed results, edited and commented on the manuscript. All the  
493 authors have accepted responsibility for the entire content of this submitted manuscript and  
494 approved submission.

495

496 **Disclosure statement:** The authors have no conflicts of interest to declare.



## 498 **References**

- 499 1. Bischoff SC, Barbara G, Buurman W, Ockhuizen T, Schulzke J-D, Serino M, et al. Intestinal  
500 permeability – a new target for disease prevention and therapy. *BMC gastroenterology* (2014)  
501 14:189. doi:10.1186/s12876-014-0189-7.
- 502 2. Arrieta MC, Bistritz L, Meddings JB. Alterations in intestinal permeability. *Gut* (2006) 55:1512–20.  
503 doi:10.1136/gut.2005.085373.
- 504 3. Cani PD, Bibiloni R, Knauf C, Waget A, Neyrinck AM, Delzenne NM, et al. Changes in gut  
505 microbiota control metabolic endotoxemia-induced inflammation in high-fat diet-induced obesity  
506 and diabetes in mice. *Diabetes* (2008) 57:1470–81. doi:10.2337/db07-1403.
- 507 4. Teixeira TF, Collado MC, Ferreira, Celia L L F, Bressan J, Peluzio, Maria do Carmo G. Potential  
508 mechanisms for the emerging link between obesity and increased intestinal permeability. *Nutrition*  
509 *research (New York, N.Y.)* (2012) 32:637–47. doi:10.1016/j.nutres.2012.07.003.
- 510 5. Frazier TH, DiBaise JK, McClain CJ. Gut microbiota, intestinal permeability, obesity-induced  
511 inflammation, and liver injury. *JPEN. Journal of parenteral and enteral nutrition* (2011) 35:14–20.  
512 doi:10.1177/0148607111413772.
- 513 6. Harris K, Kassis A, Major G, Chou CJ. Is the gut microbiota a new factor contributing to obesity  
514 and its metabolic disorders? *Journal of obesity* (2012) 2012:879151. doi:10.1155/2012/879151.
- 515 7. Burcelin R, Serino M, Chabo C, Garidou L, Pomie C, Courtney M, et al. Metagenome and  
516 metabolism: the tissue microbiota hypothesis. *Diabetes, obesity & metabolism* (2013) 15 Suppl  
517 3:61–70. doi:10.1111/dom.12157.
- 518 8. Cani PD, Possemiers S, Van de Wiele, T, Guiot Y, Everard A, Rottier O, et al. Changes in gut  
519 microbiota control inflammation in obese mice through a mechanism involving GLP-2-driven  
520 improvement of gut permeability. *Gut* (2009) 58:1091–103. doi:10.1136/gut.2008.165886.
- 521 9. Turnbaugh PJ, Backhed F, Fulton L, Gordon JL. Diet-induced obesity is linked to marked but  
522 reversible alterations in the mouse distal gut microbiome. *Cell host & microbe* (2008) 3:213–23.  
523 doi:10.1016/j.chom.2008.02.015.
- 524 10. Ortiz S, Zapater P, Estrada JL, Enriquez P, Rey M, Abad A, et al. Bacterial DNA translocation  
525 holds increased insulin resistance and systemic inflammatory levels in morbid obese patients. *The*  
526 *Journal of clinical endocrinology and metabolism* (2014) 99:2575–83. doi:10.1210/jc.2013-4483.

- 527 11. Sato J, Kanazawa A, Ikeda F, Yoshihara T, Goto H, Abe H, et al. Gut dysbiosis and detection of  
528 "live gut bacteria" in blood of Japanese patients with type 2 diabetes. *Diabetes care* (2014)  
529 37:2343–50. doi:10.2337/dc13-2817.
- 530 12. Fasano A, Baudry B, Pumplun DW, Wasserman SS, Tall BD, Ketley JM, et al. *Vibrio cholerae*  
531 produces a second enterotoxin, which affects intestinal tight junctions. *Proceedings of the*  
532 *National Academy of Sciences of the United States of America* (1991) 88:5242–6.
- 533 13. Fasano A, Fiorentini C, Donelli G, Uzzau S, Kaper JB, Margaretten K, et al. Zonula occludens  
534 toxin modulates tight junctions through protein kinase C-dependent actin reorganization, in vitro.  
535 *The Journal of clinical investigation* (1995) 96:710–20. doi:10.1172/JCI118114.
- 536 14. Tripathi A, Lammers KM, Goldblum S, Shea-Donohue T, Netzel-Arnett S, Buzza MS, et al.  
537 Identification of human zonulin, a physiological modulator of tight junctions, as preheptoglobin-2.  
538 *Proceedings of the National Academy of Sciences of the United States of America* (2009)  
539 106:16799–804. doi:10.1073/pnas.0906773106.
- 540 15. Wobeto, VÃ\textcentnia Peretti de Albuquerque, Zaccariotto TR, Sonati Md. Polymorphism of  
541 human haptoglobin and its clinical importance. *Genetics and Molecular Biology* 31:602–20.
- 542 16. Langlois MR, Delanghe JR. Biological and clinical significance of haptoglobin polymorphism in  
543 humans. *Clinical chemistry* (1996) 42:1589–600.
- 544 17. Koch W, Latz W, Eichinger M, Roguin A, Levy AP, Schomig A, et al. Genotyping of the common  
545 haptoglobin Hp 1/2 polymorphism based on PCR. *Clinical chemistry* (2002) 48:1377–82.
- 546 18. Fasano A. Zonulin and its regulation of intestinal barrier function: the biological door to  
547 inflammation, autoimmunity, and cancer. *Physiological reviews* (2011) 91:151–75.  
548 doi:10.1152/physrev.00003.2008.
- 549 19. Zhang D, Zhang L, Zheng Y, Yue F, Russell RD, Zeng Y. Circulating zonulin levels in newly  
550 diagnosed Chinese type 2 diabetes patients. *Diabetes research and clinical practice* (2014)  
551 106:312–8. doi:10.1016/j.diabres.2014.08.017.
- 552 20. Żak-Gołąb A, Kocelak P, Aptekorz M, Zientara M, Juszczuk Ł, Martirosian G, et al. Gut  
553 Microbiota, Microinflammation, Metabolic Profile, and Zonulin Concentration in Obese and Normal  
554 Weight Subjects. *International Journal of Endocrinology* (2013) 2013:9. doi:10.1155/2013/674106.
- 555 21. Moreno-Navarrete JM, Sabater M, Ortega F, Ricart W, Fernandez-Real JM. Circulating zonulin, a  
556 marker of intestinal permeability, is increased in association with obesity-associated insulin  
557 resistance. *PloS one* (2012) 7:e37160. doi:10.1371/journal.pone.0037160.

- 558 22. Tonjes A, Zeggini E, Kovacs P, Bottcher Y, Schleinitz D, Dietrich K, et al. Association of FTO  
559 variants with BMI and fat mass in the self-contained population of Sorbs in Germany. *European*  
560 *journal of human genetics EJHG* (2010) 18:104–10. doi:10.1038/ejhg.2009.107.
- 561 23. Tonjes A, Koriath M, Schleinitz D, Dietrich K, Bottcher Y, Rayner NW, et al. Genetic variation in  
562 GPR133 is associated with height: genome wide association study in the self-contained  
563 population of Sorbs. *Human molecular genetics* (2009) 18:4662–8. doi:10.1093/hmg/ddp423.
- 564 24. Veeramah KR, Tönjes A, Kovacs P, Gross A, Wegmann D, Geary P, et al. Genetic variation in the  
565 Sorbs of eastern Germany in the context of broader European genetic diversity. *European Journal*  
566 *of Human Genetics* (2011) 19:995–1001. doi:10.1038/ejhg.2011.65.
- 567 25. Wang W, Uzzau S, Goldblum SE, Fasano A. Human zonulin, a potential modulator of intestinal  
568 tight junctions. *Journal of cell science* (2000) 113 Pt 24:4435–40.
- 569 26. Shevchenko A, Tomas H, Havlis J, Olsen JV, Mann M. In-gel digestion for mass spectrometric  
570 characterization of proteins and proteomes. *Nature protocols* (2006) 1:2856–60.  
571 doi:10.1038/nprot.2006.468.
- 572 27. Damms-Machado A, Louis S, Schnitzer A, Volynets V, Rings A, Basrai M, et al. Gut permeability  
573 is related to body weight, fatty liver disease, and insulin resistance in obese individuals  
574 undergoing weight reduction. *The American journal of clinical nutrition* (2017) 105:127–35.  
575 doi:10.3945/ajcn.116.131110.
- 576 28. Sapone A, Magistris L de, Pietzak M, Clemente MG, Tripathi A, Cucca F, et al. Zonulin  
577 upregulation is associated with increased gut permeability in subjects with type 1 diabetes and  
578 their relatives. *Diabetes* (2006) 55:1443–9.
- 579 29. Drago S, El Asmar R, Di Pierro M, Grazia Clemente M, Tripathi A, Sapone A, et al. Gliadin,  
580 zonulin and gut permeability: Effects on celiac and non-celiac intestinal mucosa and intestinal cell  
581 lines. *Scandinavian journal of gastroenterology* (2006) 41:408–19.  
582 doi:10.1080/00365520500235334.
- 583 30. Thomsen JH, Etzerodt A, Svendsen P, Moestrup SK. The Haptoglobin-CD163-Heme Oxygenase-  
584 1 Pathway for Hemoglobin Scavenging. *Oxidative Medicine and Cellular Longevity* (2013)  
585 2013:11. doi:10.1155/2013/523652.
- 586 31. Sadler JE. Biochemistry and Genetics of von Willebrand Factor. *Annual Review of Biochemistry*  
587 (1998) 67:395–424. doi:10.1146/annurev.biochem.67.1.395.

- 588 32. Chen J, Wang J, Su C, Qian W, Sun L, Sun H, et al. Urinary trypsin inhibitor attenuates LPS-  
589 induced endothelial barrier dysfunction by upregulation of vascular endothelial-cadherin  
590 expression. *Inflammation Research* (2016) 65:213–24. doi:10.1007/s00011-015-0907-9.
- 591 33. Tegla CA, Cudrici C, Patel S, Trippe R, Rus V, Niculescu F, et al. MEMBRANE ATTACK BY  
592 COMPLEMENT: THE ASSEMBLY AND BIOLOGY OF TERMINAL COMPLEMENT  
593 COMPLEXES. *Immunologic research* (2011) 51:45–60. doi:10.1007/s12026-011-8239-5.
- 594 34. Yui S, Nakatani Y, Mikami M. Calprotectin (S100A8/S100A9), an inflammatory protein complex  
595 from neutrophils with a broad apoptosis-inducing activity. *Biological & pharmaceutical bulletin*  
596 (2003) 26:753–60.
- 597 35. Kouser L, Abdul-Aziz M, Nayak A, Stover CM, Sim RB, Kishore U. Properdin and Factor H:  
598 Opposing Players on the Alternative Complement Pathway “See-Saw”. *Frontiers in Immunology*  
599 (2013) 4:93. doi:10.3389/fimmu.2013.00093.
- 600 36. Rittirsch D, Flierl MA, Nadeau BA, Day DE, Huber-Lang MS, Grailer JJ, et al. Zonulin as  
601 prehepato-globin2 regulates lung permeability and activates the complement system. *American*  
602 *journal of physiology. Lung cellular and molecular physiology* (2013) 304:72.  
603 doi:10.1152/ajplung.00196.2012.
- 604 37. Shirey KA, Lai W, Patel MC, Pletneva LM, Pang C, Kurt-Jones E, et al. Novel strategies for  
605 targeting innate immune responses to influenza. *Mucosal immunology* (2016) 9:1173–82.  
606 doi:10.1038/mi.2015.141.
- 607 38. About IM, Brand KH, Zomer A, van den Hurk WH, Schilders G, Brouwer ML, et al. Prospective  
608 observational study in two Dutch hospitals to assess the performance of inflammatory plasma  
609 markers to determine disease severity of viral respiratory tract infections in children. *BMJ open*  
610 (2017) 7:e014596. doi:10.1136/bmjopen-2016-014596.
- 611 39. Wicher KB, Fries E. Haptoglobin, a hemoglobin-binding plasma protein, is present in bony fish  
612 and mammals but not in frog and chicken. *Proceedings of the National Academy of Sciences of*  
613 *the United States of America* (2005) 103:4168–73. doi:10.1073/pnas.0508723103.
- 614 40. Kurosky A, Barnett DR, Lee TH, Touchstone B, Hay RE, Arnott MS, et al. Covalent structure of  
615 human haptoglobin: A serine protease homolog. *Proceedings of the National Academy of*  
616 *Sciences of the United States of America* (1980) 77:3388–92.
- 617 41. Nielsen MJ, Petersen SV, Jacobsen C, Thirup S, Enghild JJ, Graversen JH, et al. A unique loop  
618 extension in the serine protease domain of haptoglobin is essential for CD163 recognition of the



- 619        haptoglobin-hemoglobin complex. *The Journal of biological chemistry* (2007) 282:1072–9.  
620        doi:10.1074/jbc.M605684200.
- 621    42. Fasano A. Regulation of intercellular tight junctions by zonula occludens toxin and its eukaryotic  
622        analogue zonulin. *Annals of the New York Academy of Sciences* (2000) 915:214–22.

623 **Tables**

624 **Table 1: Composition of the study cohort included in zonulin measurements.**

|                               | <i>all</i>   | <i>female</i> | <i>male</i> |
|-------------------------------|--------------|---------------|-------------|
| <i>n</i>                      | 376          | 233           | 143         |
| <i>Age (years)</i>            | 53.3 ± 16.2  | 52.7 ± 15.8   | 54.2 ± 16.8 |
| <i>BMI (kg/m<sup>2</sup>)</i> | 28.1 ± 5.6   | 27.9 ± 5.9    | 28.5 ± 5.1  |
| <i>NGT</i>                    | 191 (50.8%)  | 124 (53.2%)   | 67 (46.8%)  |
| <i>IGT</i>                    | 79 (21.0%)   | 49 (21.0%)    | 30 (21.0%)  |
| <i>T2D</i>                    | 106 (28.2 %) | 60 (25.8%)    | 46 (32.2%)  |

625 Age and BMI are mean ± SD, NGT, IGT, T2D as absolute number (percentage); NGT:  
 626 normal glucose tolerance; IGT: impaired glucose tolerance; IFG: impaired fasting glucose  
 627

628 **Table 2: Main characteristics of the study participants.**

|                                   | <i>NGT</i>      | <i>IGT</i>        | <i>T2D</i>         |
|-----------------------------------|-----------------|-------------------|--------------------|
| <i>n</i>                          | 191             | 79                | 106                |
| <i>Age (years)</i>                | 45.4 ± 15.6     | 59.7 ± 29.4**     | 62.9 ± 11.2**      |
| <i>BMI (kg/m<sup>2</sup>)</i>     | 25.8 ± 5        | 29.7 ± 4.6**      | 30.97 ± 5.53**     |
| <i>WHR</i>                        | 0.84 ± 0.10     | 0.92 ± 0.09       | 0.94 ± 0.09**      |
| <i>FPG (mmol/l)</i>               | 5.15 ± 0.50     | 5.68 ± 0.56**     | 7.72 ± 2.43** °°   |
| <i>120 min PG (mmol/l)</i>        | 5.00 ± 1.40     | 8.95 ± 0.98**     | 5.78 ± 6.86 °°     |
| <i>Triglycerides (mmol/l)</i>     | 1.29 ± 0.94     | 1.56 ± 0.92*      | 1.87 ± 1.24**      |
| <i>Fasting Insulin (pmol/l)</i>   | 35.90 ± 25.98   | 53.56 ± 25.98**   | 62.38 ± 43.07**    |
| <i>120 min Insulin (pmol/l)</i>   | 148.39 ± 133.58 | 409.28 ± 232.81** | 182.22 ± 272.34 °° |
| <i>HDL (mmol/l)</i>               | 1.69 ± 0.40     | 1.56 ± 0.36*      | 1.43 ± 0.39** °    |
| <i>LDL (mmol/l)</i>               | 3.20 ± 0.96     | 3.70 ± 1.06**     | 3.33 ± 0.95 °      |
| <i>Total cholesterol (mmol/l)</i> | 5.12 ± 1.03     | 5.57 ± 1.18*      | 5.27 ± 0.99        |
| <i>HOMA IR (pmol/l*mmol/l)</i>    | 1.34 ± 1.06     | 2.30 ± 1.1**      | 3.58 ± 2.87** °°   |
| <i>HOMA IS (ratio)</i>            | 1.07 ± 0.76     | 0.67 ± 0.78**     | 0.68 ± 1.63**      |
| <i>CRP (mg/l)</i>                 | 2.22 ± 4.20     | 3.19 ± 4.54       | 3.87 ± 4.76**      |
| <i>Zonulin (ng/ml)</i>            | 67.25 ± 25.45   | 71.88 ± 29.36     | 81.78 ± 25.31** °° |

629

630 \*: p<0.05 vs NGT; \*\*: p<0.01 vs NGT

631 °: p<0.05 vs IGT; °°: p<0.01 vs IGT

632 All data given as mean ± standard deviation, NGT: normal glucose tolerance, IGT: impaired  
 633 glucose tolerance, T2D: type 2 diabetes, CRP: C-reactive protein, HDL: High density  
 634 lipoprotein, LDL: Low density lipoprotein, FPG: Fasting plasma glucose, WHR: Waist to hip  
 635 ratio

636

637

**Table 3: Correlation of ELISA signal with metabolic phenotypes.**

|                             | <i>Non-adjusted</i> |                            | <i>Adjusted for age, sex, BMI</i> |                             |
|-----------------------------|---------------------|----------------------------|-----------------------------------|-----------------------------|
|                             | <i>r</i>            | <i>p-value</i>             | <i>r</i>                          | <i>p-value</i>              |
| <i>Anthropometric trait</i> |                     |                            |                                   |                             |
| <i>Age</i>                  | 0.31                | 0.55                       | -                                 | -                           |
| <i>Sex</i>                  | -0.005              | 0.93                       | -                                 | -                           |
| <i>BMI</i>                  | <b>0.221</b>        | <b>1.2x10<sup>-5</sup></b> | -                                 | -                           |
| <i>WHR</i>                  | <b>0.172</b>        | <b>7.3x10<sup>-4</sup></b> | <b>0.118</b>                      | <b>2.1 x10<sup>-2</sup></b> |
| <i>Glucose metabolism</i>   |                     |                            |                                   |                             |
| <i>Glucose (0 min)</i>      | <b>0.294</b>        | <b>6.6x10<sup>-9</sup></b> | <b>0.227</b>                      | <b>9.0 x10<sup>-6</sup></b> |
| <i>Glucose (120 min)</i>    | -0.039              | 0.45                       | -0.046                            | 0.38                        |
| <i>Insulin (0 min)</i>      | <b>0.173</b>        | <b>7.7x10<sup>-4</sup></b> | 0.079                             | 0.13                        |
| <i>Insulin (120 min)</i>    | -0.039              | 0.46                       | -0.044                            | 0.39                        |
| <i>HOMA IR</i>              | <b>0.244</b>        | <b>2.0x10<sup>-6</sup></b> | <b>0.149</b>                      | <b>4.0 x10<sup>-3</sup></b> |

|                           |                     |                                    |                     |                                     |
|---------------------------|---------------------|------------------------------------|---------------------|-------------------------------------|
| <i>HOMA IS</i>            | <b>-0.243</b>       | <b>2.0x10<sup>-6</sup></b>         | <b>-0.145</b>       | <b>4.9 x10<sup>-3</sup></b>         |
| <i>Lipid metabolism</i>   |                     |                                    |                     |                                     |
| <i>Triglycerides</i>      | <b><u>0.370</u></b> | <b><u>6.5x10<sup>-14</sup></u></b> | <b><u>0.312</u></b> | <b><u>4.2 x10<sup>-10</sup></u></b> |
| <i>Total cholesterol</i>  | <b><u>0.219</u></b> | <b><u>1.5x10<sup>-5</sup></u></b>  | <b><u>0.211</u></b> | <b><u>3.3x10<sup>-5</sup></u></b>   |
| <i>LDL</i>                | <b>0.182</b>        | <b>3.4x10<sup>-4</sup></b>         | <b>0.160</b>        | <b>1.7 x10<sup>-3</sup></b>         |
| <i>HDL</i>                | <b>-0.136</b>       | <b>7.7x10<sup>-3</sup></b>         | -0.063              | 0.22                                |
| <i>Apolipoprotein B</i>   | <b><u>0.247</u></b> | <b><u>9.9x10<sup>-7</sup></u></b>  | <b><u>0.215</u></b> | <b><u>2.3x10<sup>-5</sup></u></b>   |
| <i>Adipokines</i>         |                     |                                    |                     |                                     |
| <i>Adiponectin</i>        | <b>-0.215</b>       | <b>2.2x10<sup>-6</sup></b>         | <b>-0.176</b>       | <b>5.4x10<sup>-4</sup></b>          |
| <i>Progranulin</i>        | <b>0.151</b>        | <b>3.0x10<sup>-3</sup></b>         | <b>0.129</b>        | <b>1.1 x10<sup>-2</sup></b>         |
| <i>Vaspin</i>             | 0.027               | 0.6                                | 0.05                | 0.33                                |
| <i>Chemerin</i>           | <b>0.103</b>        | <b>4.3x10<sup>-2</sup></b>         | 0.065               | 0.21                                |
| <i>FGF21</i>              | <b>0.165</b>        | <b>2.1x10<sup>-3</sup></b>         | <b>0.152</b>        | <b>4.7x10<sup>-3</sup></b>          |
| <i>Other</i>              |                     |                                    |                     |                                     |
| <i>C-reactive protein</i> | <b>0.232</b>        | <b>4.0x10<sup>-6</sup></b>         | <b>0.166</b>        | <b>1.1x10<sup>-3</sup></b>          |
| <i>Total protein</i>      | <b>0.124</b>        | <b>1.5x10<sup>-2</sup></b>         | <b>0.134</b>        | <b>8.6x10<sup>-3</sup></b>          |
| <i>Hemoglobin</i>         | <b>0.201</b>        | <b>7.4x10<sup>-5</sup></b>         | <b>0.143</b>        | <b>5.1x10<sup>-3</sup></b>          |
| <i>Uric acid</i>          | <b>0.176</b>        | <b>5.2x10<sup>-4</sup></b>         | <b>0.110</b>        | <b>3.1 x10<sup>-2</sup></b>         |

638

639

640

641

642

643

644

**bold:** significant correlations after adjustment, underlined: significant after Bonferroni adjustment for multiple testing ( $p < 5.2 \times 10^{-4}$ ); r: Spearman rank correlation coefficient, p: significance level; BMI: Body Mass Index; HDL: High density lipoprotein, LDL: Low density lipoprotein, WHR: Waist to hip ratio, FGF21: Fibroblast growth factor 21, HOMA-IR/IS: Homeostasis Model Assessment Insulin Resistance/ Insulin Sensitivity.

645 **Figure legends**

646

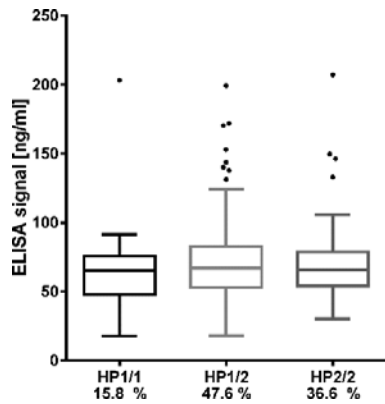

647

648 **Fig 1. Distribution of zonulin ELISA values according to haptoglobin genotypes.**

649 Data is presented as boxplots with Turkey-Whiskers and outliers.

650

651

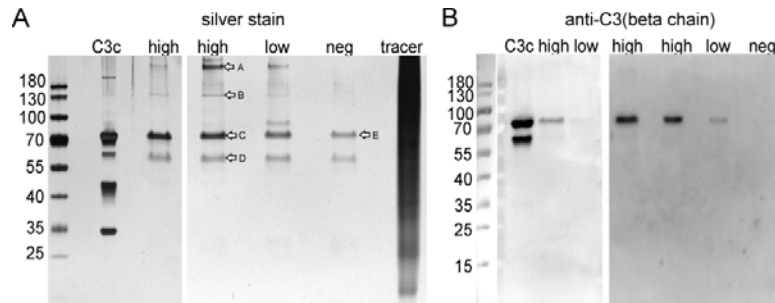

652

653 **Fig 2. A) Silver stain of immunoprecipitated ELISA products and B) Western blot**  
654 **analyses using an anti-C3  $\beta$ -chain antibody.**

655 Commercially available C3c protein isolated from human plasma was run as positive control.  
656 high: pooled IP samples of sera that gave highest ELISA signals; low: pooled IP samples of  
657 sera that gave lowest ELISA signals; neg: negative control using dilution buffer from the  
658 ELISA kit; tracer: competitive tracer reagent from the ELISA kit. Letters in (A) indicated  
659 bands analyzed by MS after tryptic in gel digestion (Supplementary Table 2).

660

661

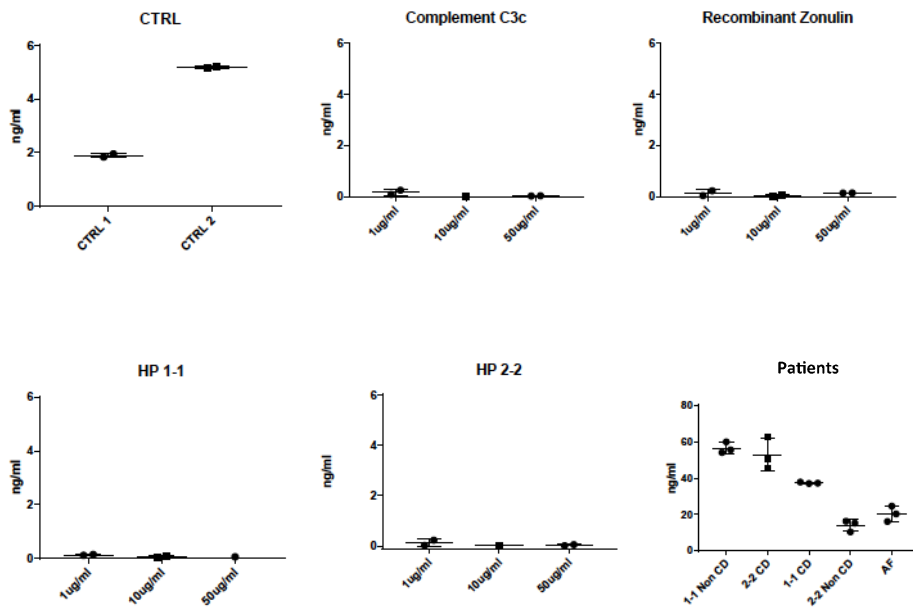

662

663 **Fig 3. Mean zonulin ELISA values obtained by testing specific candidate target proteins**  
 664 **and patients' serum samples.** This ELISA kit did not detect increasing concentrations (range  
 665 1-50 µg/ml) of complement, recombinant zonulin (pre-HP2), mature HP1 or mature HP2.  
 666 Conversely, a strong signal was detected in sera of both celiac disease patients (CD) and  
 667 healthy controls (non-CD, internal control AF with HP2-2), irrespective of their HP genotype.  
 668 All samples are technical triplicates, kit controls are shown for comparison.  
 669

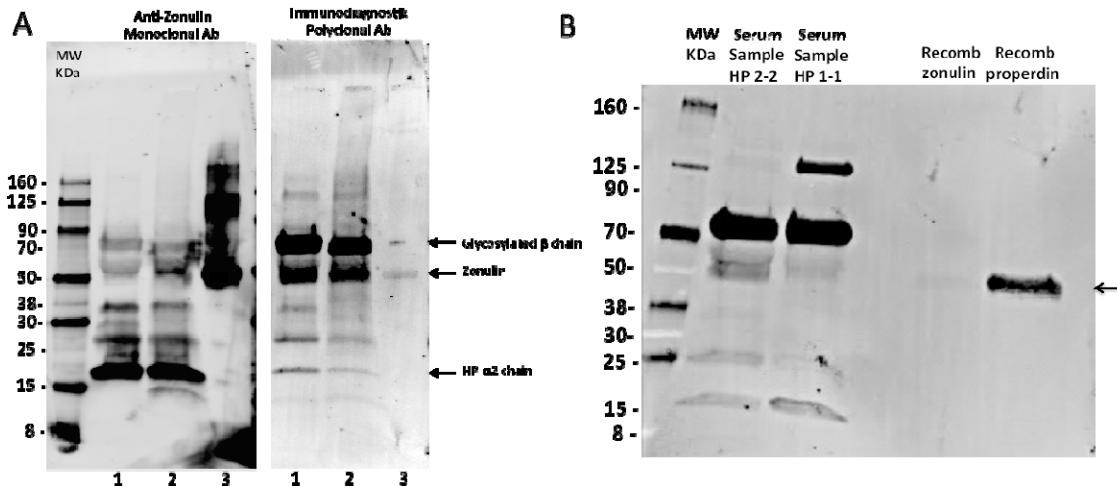

670

671

672 **Fig 4. Western blot analyses of a prototype human serum sample (AF HP2-2) using both**  
 673 **anti-zonulin monoclonal antibodies and Immundiagnostik polyclonal antibodies.** (A)  
 674 Prototype serum sample of a HP2-2 homozygous subject, either untreated (lane 1) or after  
 675 deglycosylation (lane 2) was resolved and then immunoblotted using either anti-zonulin  
 676 monoclonal antibodies (left panel) or Immundiagnostik polyclonal antibodies (right panel).  
 677 Recombinant zonulin was added as control (lane 3). As anticipated, zonulin monoclonal  
 678 antibodies recognize the recombinant protein as well as a series of serum bands, with the  
 679 strongest signal being related to the 16kDa zonulin α2-chain. The Immundiagnostik  
 680 polyclonal antibodies also recognize recombinant zonulin but with a much weaker signal

681 compared to the monoclonal antibodies. These antibodies also recognize the same serum  
682 bands detected by the zonulin monoclonal antibodies, with the ~70 and 52 kDa bands being  
683 highlighted with the strongest signal. Sample's deglycosylation showed the shift of the 70  
684 kDa band to a lower MW, suggesting that this may represent the zonulin  $\beta$ -chain as we have  
685 previously shown (14). (B) Prototype serum samples of a HP1-1 and a HP2-2 homozygous  
686 subject were resolved and immunoblotted using the Immundiagnostik polyclonal antibodies.  
687 Recombinant zonulin and properdin were added as control. The antibodies also detect  
688 properdin that migrated at the same molecular weight of zonulin and serum bands recognized  
689 by the antibodies in both HP2-2 and HP 1-1 subjects.  
690

691

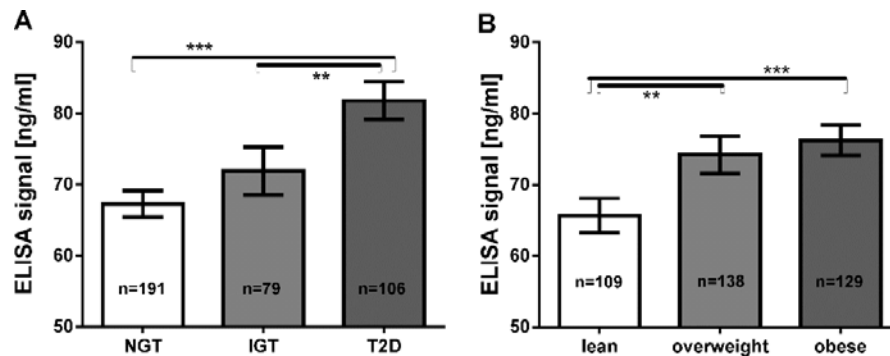

692

693 **Fig 5. A) Mean zonulin ELISA values according to glucose tolerance groups B) mean**  
694 **ELISA values according to BMI groups.** \*\*: p<0.01; \*\*\*: p<0.001  
695 NGT: normal glucose tolerance, IGT: impaired glucose tolerance, T2D: type 2 diabetes  
696

## 697 Supporting Information

698 S1 Table: Characteristics of serum samples used for antibody capture experiments

699 S2 Table: Mass spectrometry results of tryptic digests

700 S3 Table: Multiple stepwise linear regression analysis
